# Supplementary material for: Fabrication of a multichannel PDMS/glass analytical microsystem with integrated electrodes for amperometric detection
Source: Royal Society of Chemistry journal article supplement (doi:10.1039/b807409g), 2008-10-23
Supplement: b807409g.pdf [file b807409g.pdf]

Supplementary Information

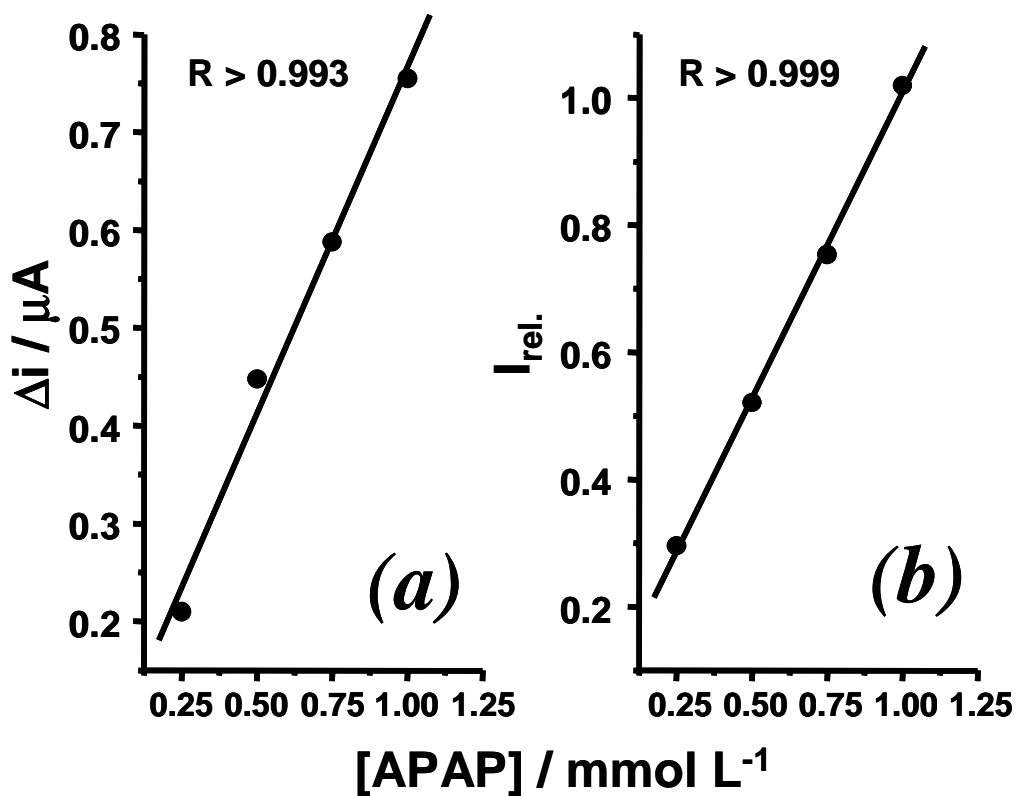

Analytical curves obtained with APAP standard solutions. a) Rough results and b) results corrected by dividing the current values by a reference dataset.
